# Supplementary material for: Self-healable, tough and highly stretchable hydrophobic association/ionic dual physically cross-linked hydrogels
Source: Royal Society of Chemistry journal article supplement (doi:10.1039/c7ra00055c), 2017-01-01
Supplement: c7ra00055c1.pdf [file c7ra00055c1.pdf]

## Supplementary information

### **Self-healable, tough and highly stretchable hydrophobic association / ionic dual physically cross-linked hydrogels**

Yulin Zhang<sup>1</sup>, Chengxin Hu<sup>1</sup>, Xu Xiang<sup>2</sup>, Yongfu Diao<sup>1</sup>, Binwei Li<sup>1</sup>, Linying Shi<sup>1</sup>, Rong Ran<sup>1</sup>

(<sup>1</sup> College of Polymer Science and Engineering, Sichuan University, <sup>2</sup> Chengdu Product Quality Supervision and  
Inspection Institute, Chengdu 610065, China )

\*Corresponding author. Email address: ranrong@scu.edu.cn

Tel:+86-28-85462890, Fax:+86-28-85462890

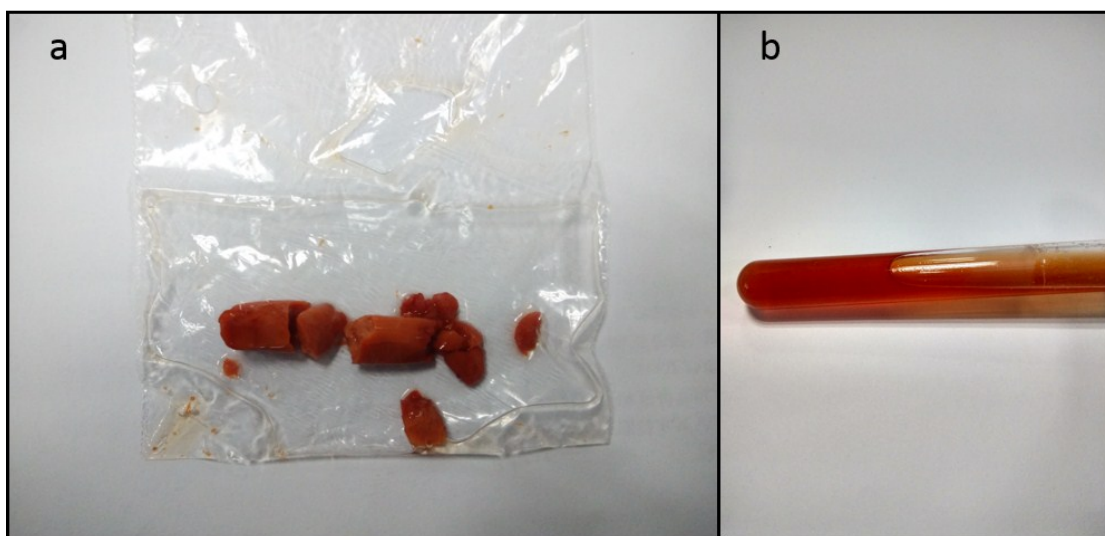

Fig. S1 Photos of (a) S-DPHF-2 and (b) C-DPHF-2

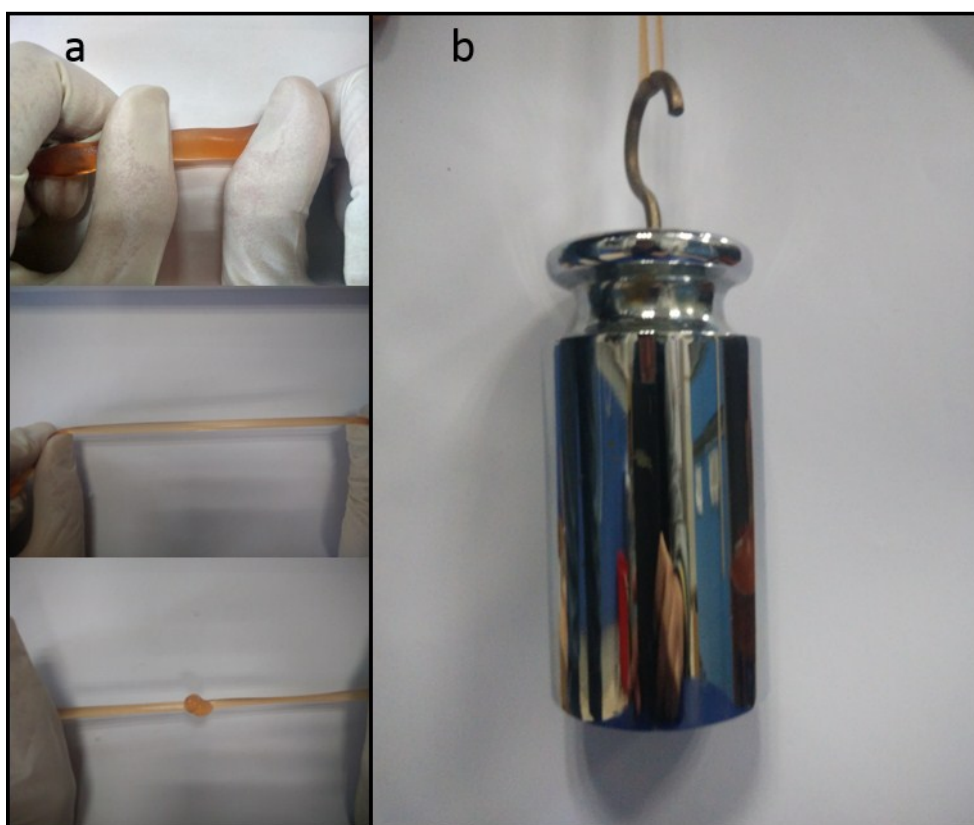

Fig. S2 Photos of S-DPHF-0.25 exhibiting excellent mechanical performance: (a) Stretching and stretching after being knotted (b) Hanging weight of 2 kg

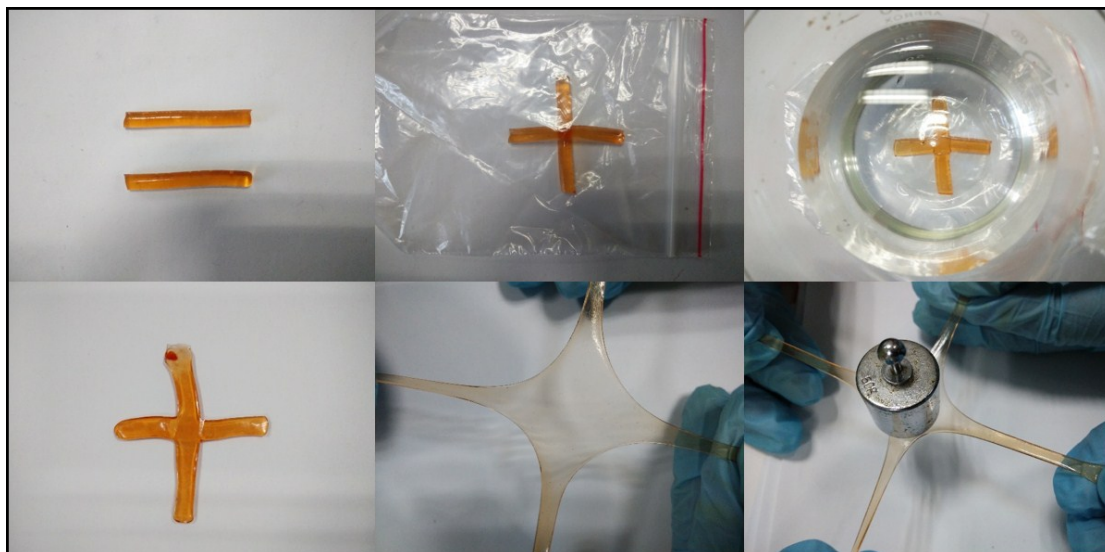

Fig. S3 Photos of the S-DPHF-0.25 gel self-healing process

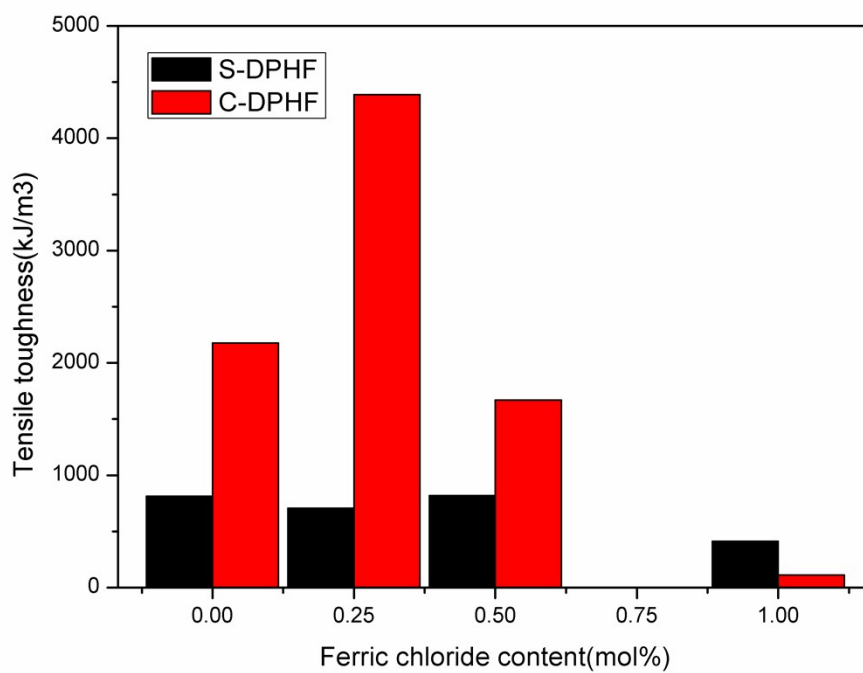

Fig. S4 Tensile toughness of S-DPHF and C-DPHF calculated from Fig. 3
